# Supplementary material
Source: Springer Nature journal article supplement (https://www.springermedizin.de/resource/supplementary/12889_2010_3358_MOESM1_ESM.pdf/9488810)

Political objectives

Statistic Variables

Equally Distributed Equivalent Percentage

Quotient always positive  
1.5 or less  
(40/60%) = equal

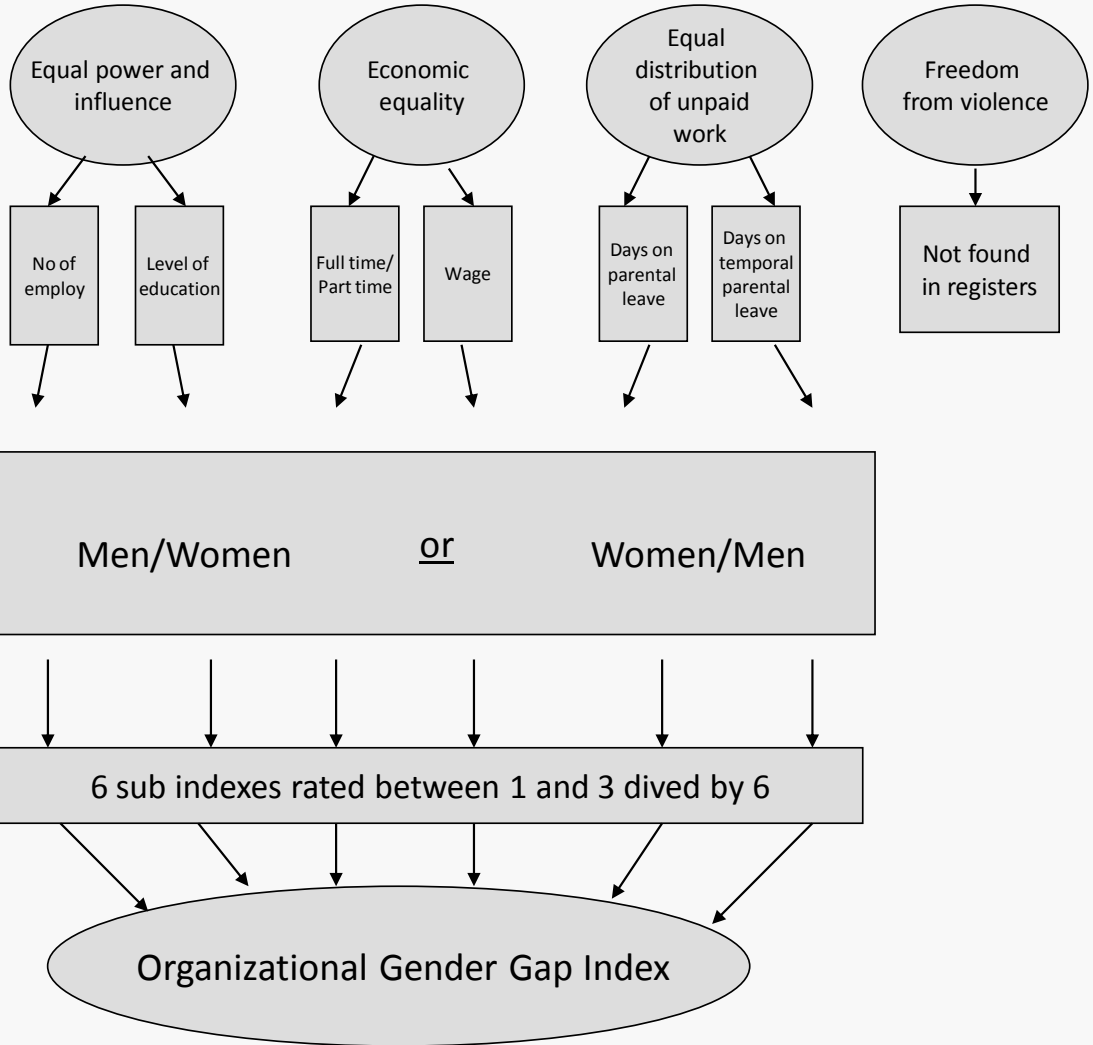

Supplement: MOESM1 [file 9488810]
